# Supplementary material for: Systems analysis of phosphate-limitation-induced lipid accumulation by the oleaginous yeast Rhodosporidium toruloides
Source: Springer Nature journal article supplement (doi:10.1186/s13068-018-1134-8), 2018-05-25
Supplement: MOESM7 [file 13068_2018_1134_MOESM7_ESM.pdf]

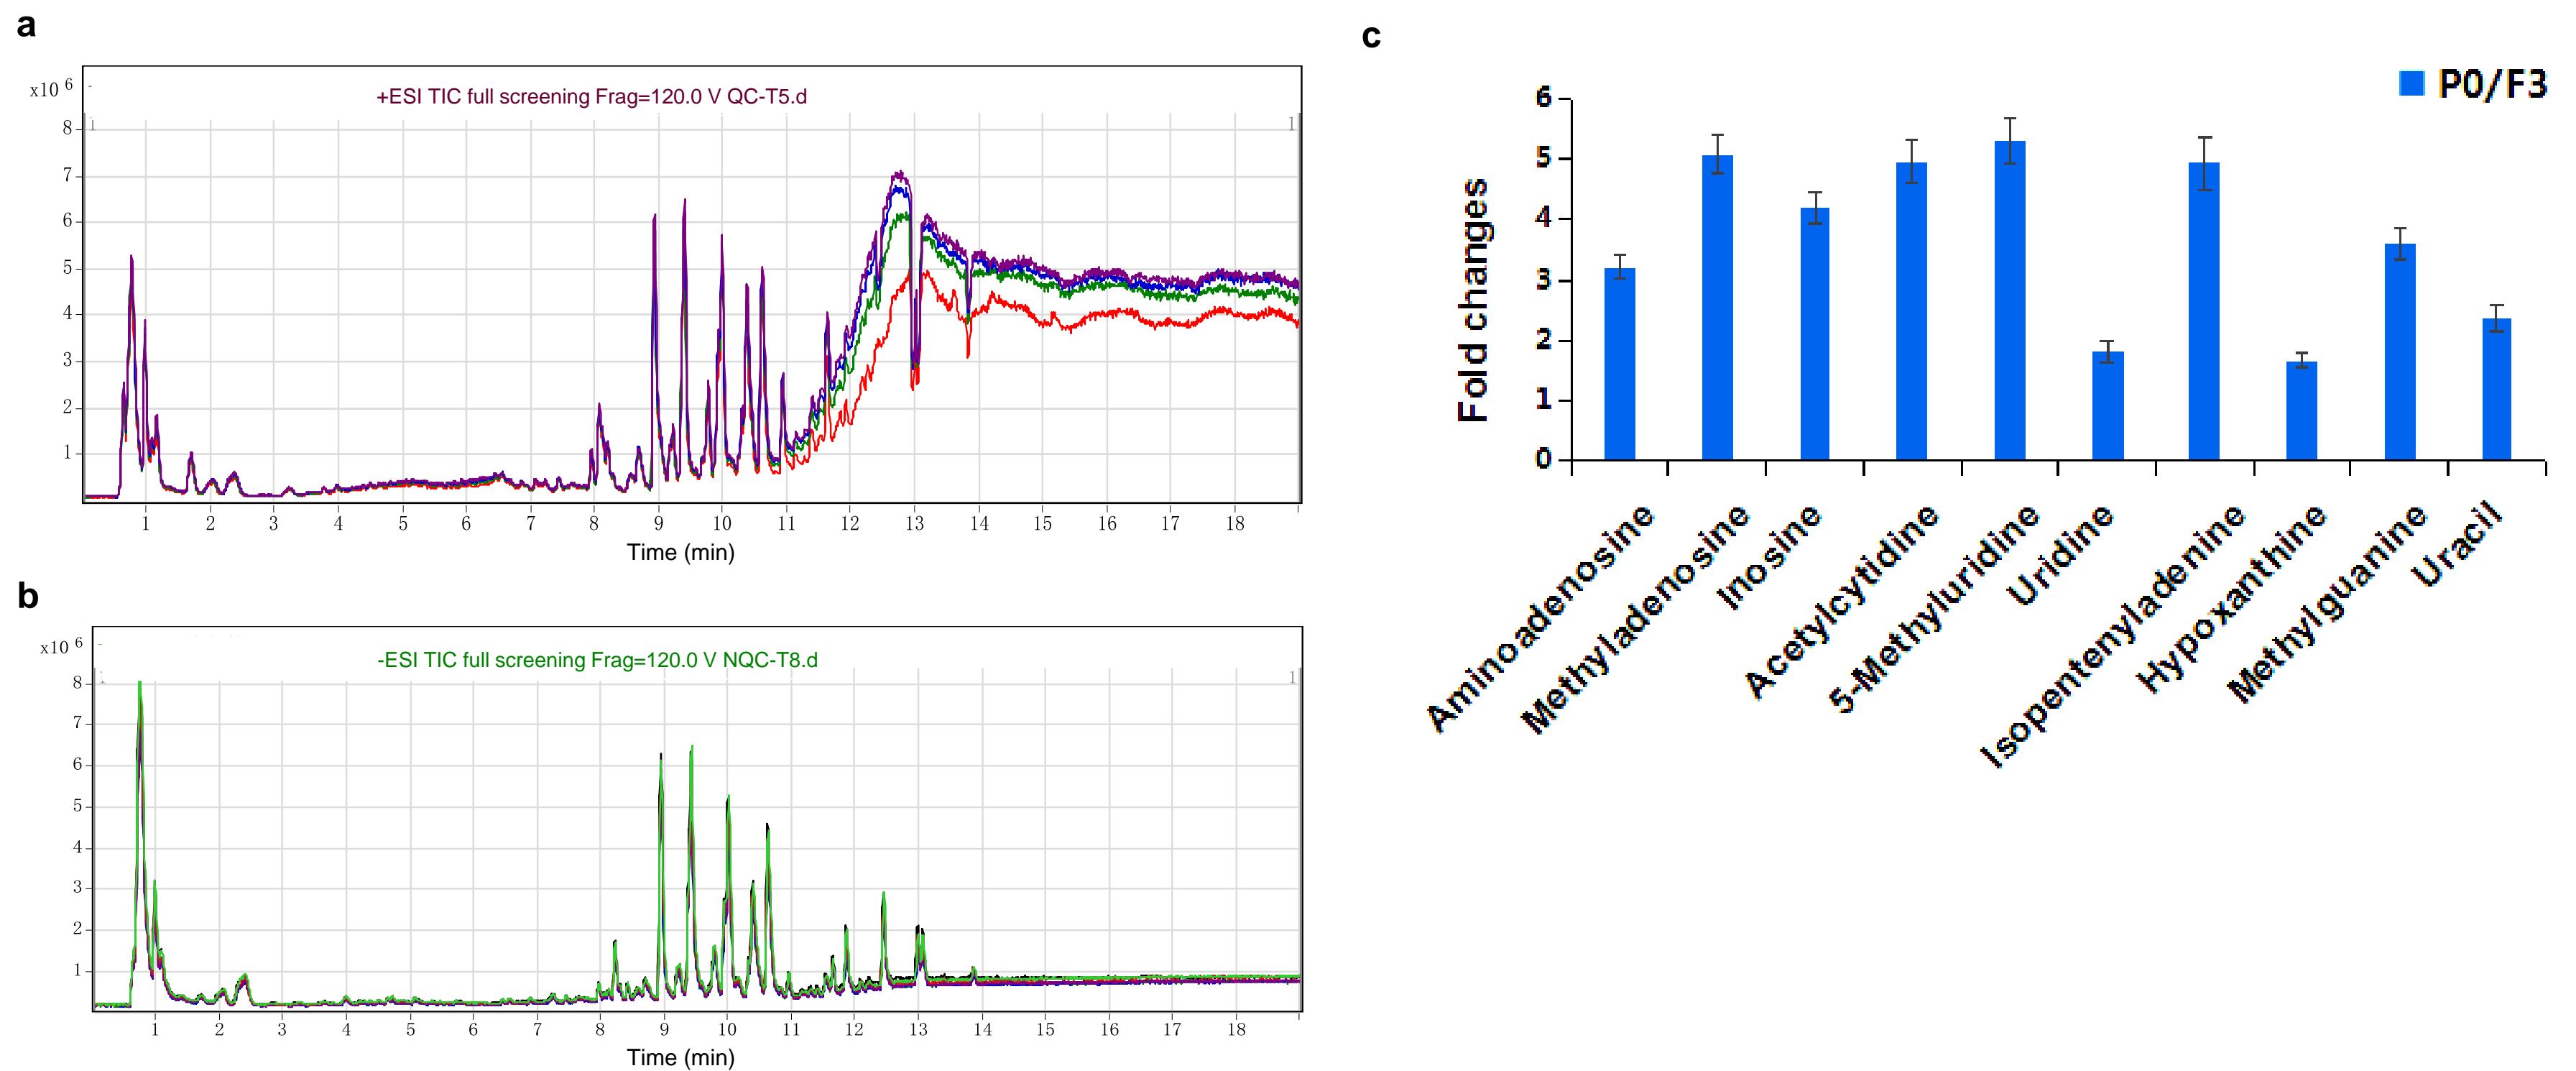

**Figure S1.** Comparative metabolomic analyses of *R. toruloides* samples prepared under Pi-limited (P0) and Pi-replete (F3) conditions. **a** Total ion chromatogram of quality control (QC) sample (positive). **b** Total ion chromatogram of QC sample (negative). **c** Changes of some cellular nucleoside derivatives and bases.

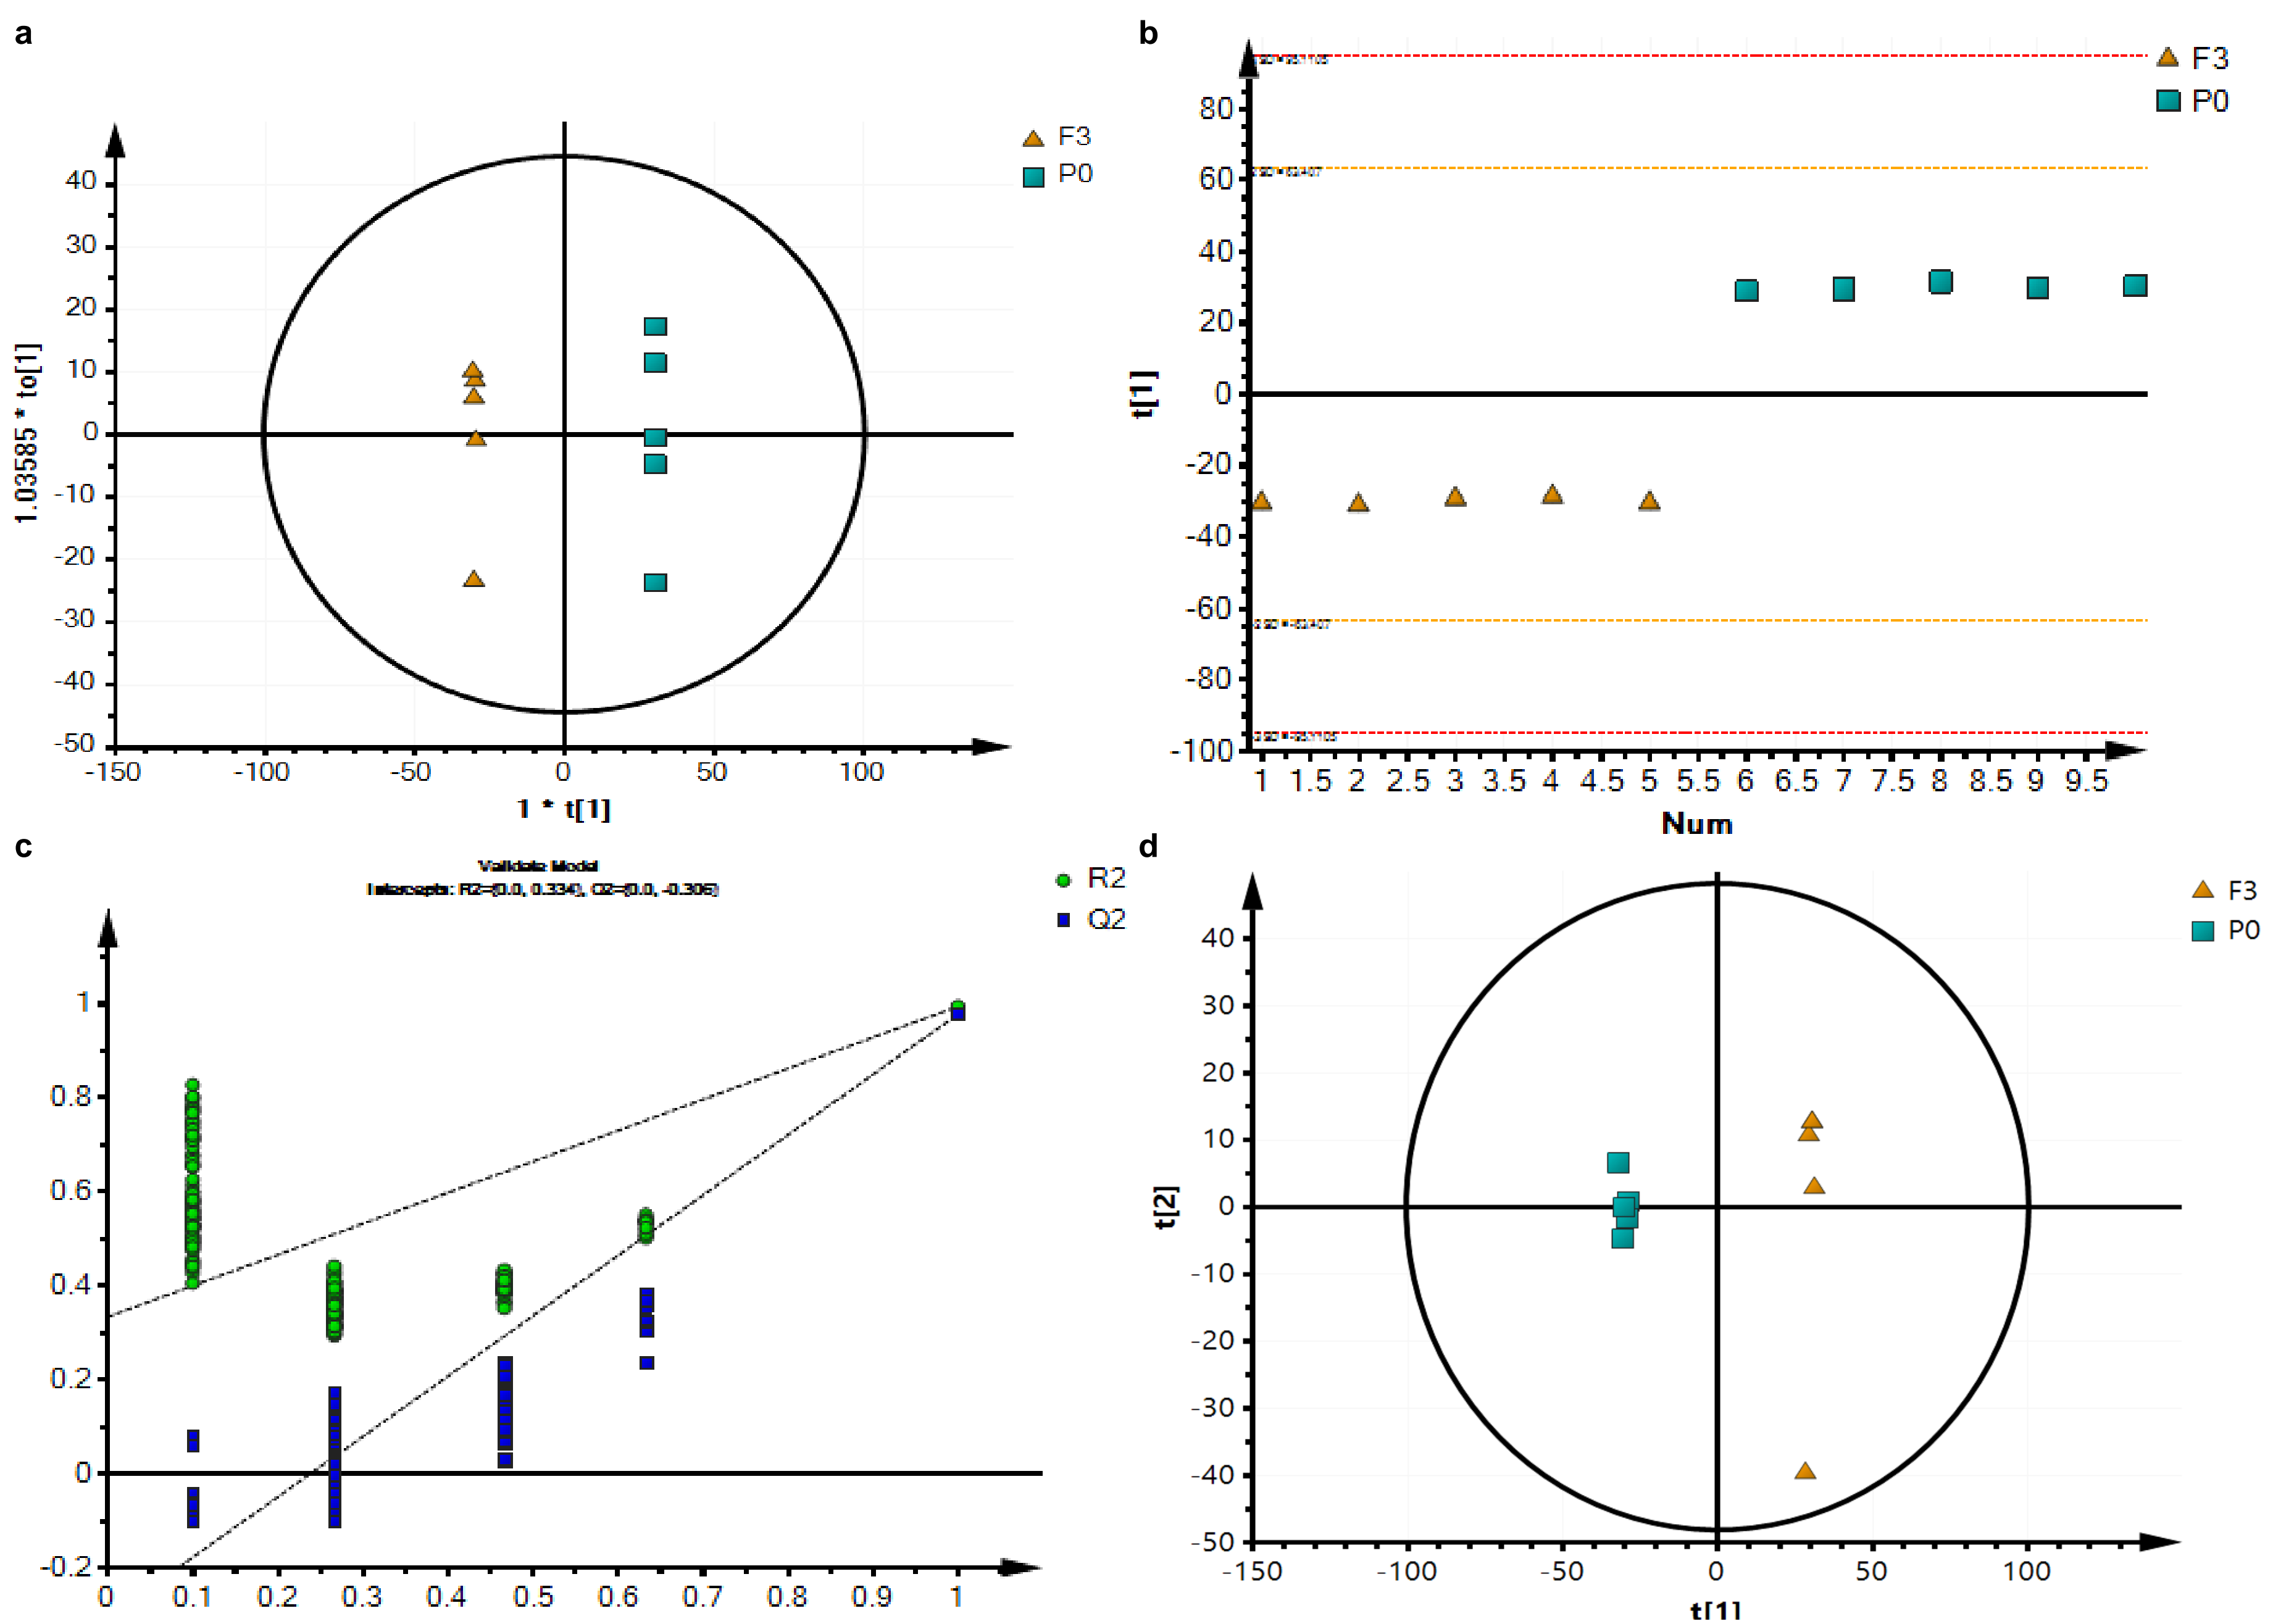

**Figure S2.** Metabolomic analysis of *R. toruloides* during phosphate limitation. **a** The score plot of PCA in P0 vs F3 (positive). **b** The score plot of PLS-DA in P0 vs F3 (positive). **c** The sorting plot of PLS-DA in P0 vs F3 (positive). **d** The score plot of OPLS-DA in P0 vs F3 (positive).

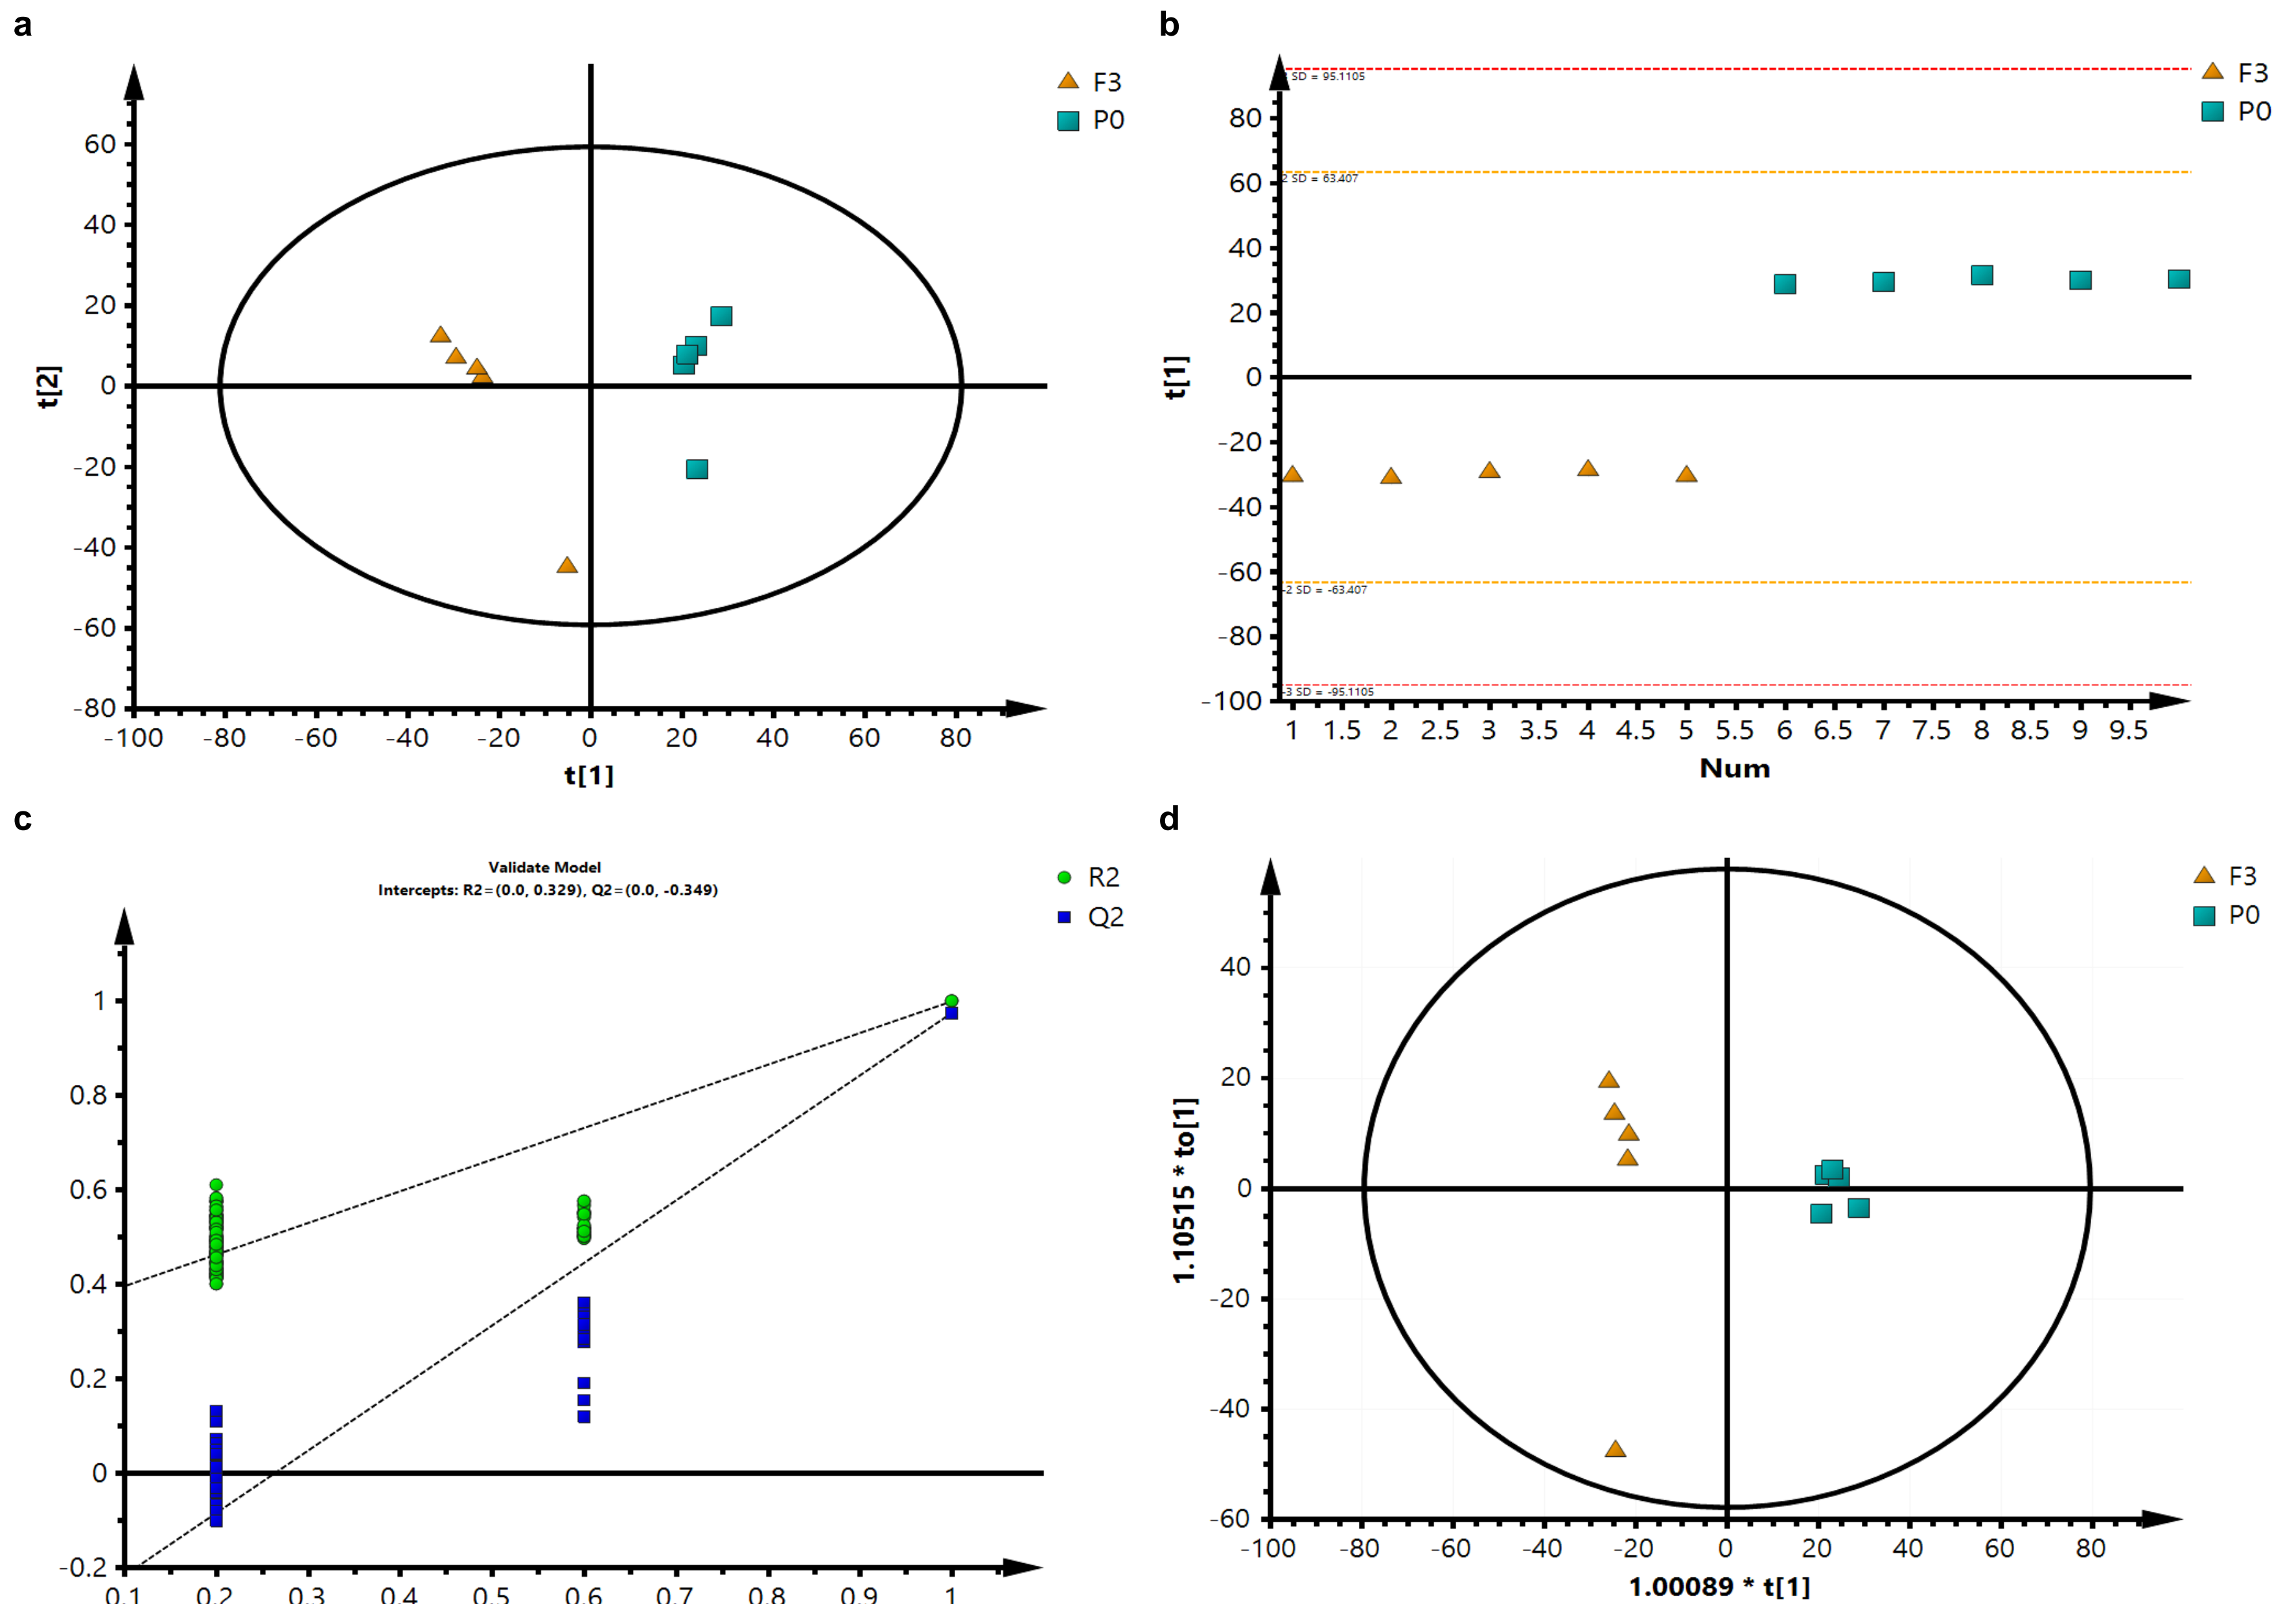

**Figure S3.** Metabolomic analysis of *R. toruloides* during phosphate limitation. **a** The score plot of PCA in P0 vs F3 (negative). **b** The score plot of PLS-DA in P0 vs F3 (negative). **c** The sorting plot of PLS-DA in P0 vs F3 (negative). **d** The score plot of OPLS-DA in P0 vs F3 (negative).
